# Supplementary material for: Overexpression of an Agave Phosphoenolpyruvate Carboxylase Improves Plant Growth and Stress Tolerance
Source: PubMed Central journal article supplement (PMC7999111; doi:10.3390/cells10030582), 2021-03-06
Supplement: cells-10-00582-s001.pdf [file cells-10-00582-s001.pdf]

## Supplementary Figures

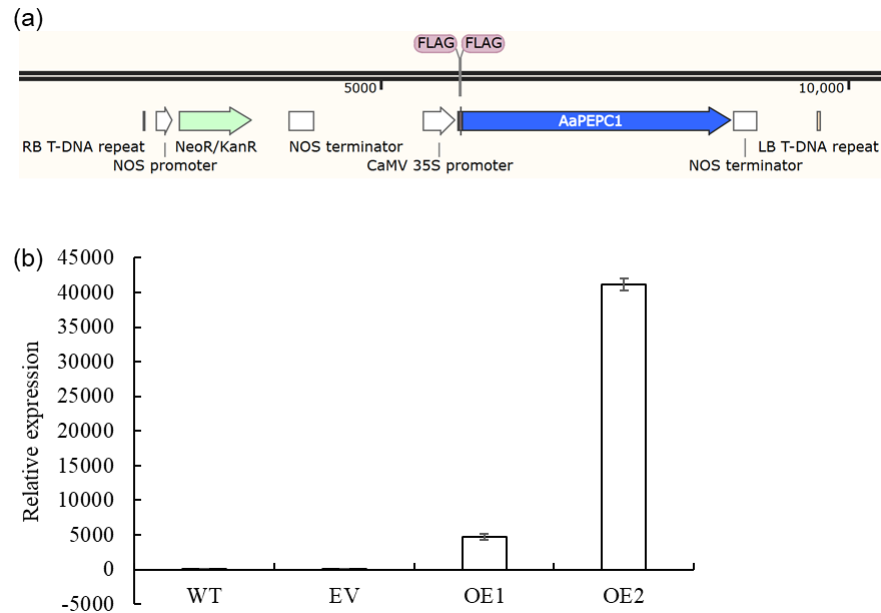

**Supplementary Figure 1. Development of transgenic lines of tobacco overexpressing *Agave americana* PHOSPHOENOLPYRUVATE CARBOXYLASE (*AaPEPC1*).** (a) Schematic representation of the DNA construct developed for the overexpression of *AaPEPC1* in transgenic tobacco. CaMV35S: cauliflower mosaic virus 35S; NOS: nopaline synthase; KanR: kanamycin resistance gene as a selection marker for screening transgenic plants; “LB” and “RB”: the left and right borders of T-DNA, respectively. The image was generated with SnapGene software (<http://www.snapgene.com/>). (b) Quantitative reverse transcription PCR (qRT-PCR) analysis to detect the expression of *AaPEPC1* in transgenic plants expressing *AaPEPC1* (OE1, OE2), empty vector (EV), and wild-types (WT).

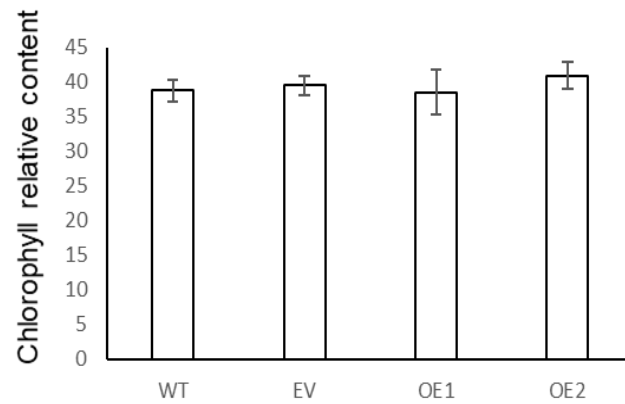

**Supplementary Figure 2. Chlorophyll relative content in the leaves of transgenic plants expressing *Agave americana* PHOSPHOENOLPYRUVATE CARBOXYLASE (*AaPEPC1*) (OE1, OE2) or empty vector (EV), and wild-types (WT) grown in pots under normal growth conditions. Values represent means  $\pm$  SD.**

**Supplementary Tables****Table S1** Primers used in this study

| <b>Primer name</b> | <b>Primer sequence (5'-3')</b> |
|--------------------|--------------------------------|
| AaPEPC1_qPCR_F2    | GCCTACAGGAGGAGGAGTACGCTG       |
| AaPEPC1_qPCR_R2    | CCTGACTGACTGAGTCGGATGTGC       |
| NsyALMT_qRT_F1     | AATGGTTCAGAGTATGGATTGG         |
| NsyALMT_qRT_R1     | TAAGTGTCGCACCTATGCTG           |
| NsyCA4_qRT_F1      | GTCAAAGCCCTAAGTTCTTGGT         |
| NsyCA4_qRT_R1      | ACCCACTCTTCAATGAAATCACTG       |
| NsyMDH_qRT_F1      | TTGGATATGCTCTTGTTCCGA          |
| NsyMDH_qRT_R1      | GCAACAACACCTTTGAGAAGAG         |
| NsyME_qRT_F1       | TGGCTTGTGGATTCAAAGGG           |
| NsyME_qRT_R1       | GGTTGGCTTAATGGTCTTAACAG        |
| NsyP5CR_qRT_F1     | TAATACTCAGGTGGTTGAAGACAG       |
| NsyP5CR_qRT_R1     | CAAAGTAAAGACAGTGGCGG           |
| NsyP5CS_qRT_F1     | CTTCAGGCACTTTCTTCCCA           |
| NsyP5CS_qRT_R1     | CATCAGCAACCTCCGTTCTC           |
| NsyTDT_qRT_F1      | TGGAAGTGTAGTGTCATGATGG         |
| NsyTDT_qRT_R1      | CTGGTGCAATGGCTAAGTATGG         |
| Nsyl_Act97_qF1     | TACCCAATTGAGCATGGAATTGTC       |
| Nsyl_Act97_qR1     | AACACAATACCGGTGGTACGA          |
